# Supplementary material for: Highly efficient hydrogen evolution of platinum via tuning the interfacial dissolved-gas concentration
Source: Royal Society of Chemistry journal article supplement (doi:10.1039/c8cc08803a), 2018-12-10
Supplement: c8cc08803a1.pdf [file c8cc08803a1.pdf]

*Supporting Information for*

**Highly efficient hydrogen evolution of platinum via tuning the interfacial  
dissolved-gas concentration**

Xu Zhao,<sup>a</sup> Ruchiranga Ranaweera,<sup>a</sup> Long Luo<sup>\*a</sup>

<sup>a</sup>Department of Chemistry, Wayne State University, Detroit, Michigan 48202, United States

\*Correspondence and requests for materials should be addressed to L. L. (email: long.luo@wayne.edu)

## Experimental Section

**Chemicals and materials.** Perchloric acid (HClO<sub>4</sub>, 70%), sodium perchlorate (NaClO<sub>4</sub>, 98%) and calcium chloride (CaCl<sub>2</sub>, 99%) were purchased from Sigma-Aldrich. Potassium perfluorooctanesulfonate (PFOS) was received from Matrix Scientific. Platinum wires (Pt, 25 and 50 μm diameter, 99.95%) were obtained from Alfa Aesar. Glass capillaries were received from Dagan Corporation. Ultrapure water (Milli-Q, 18.2 MΩ) was used in all experiments.

**Fabrication of Pt nanoelectrode.** The Pt nanoelectrodes were fabricated through two steps based on a previous method.<sup>1</sup> First, the Pt tips were prepared by electrochemically etching of Pt wire in 15 wt% CaCl<sub>2</sub> solution using a 100 Hz sinusoidal wave with an amplitude of 4.0 V. After sharpening, the Pt tips were washed by water. Second, the as-prepared Pt tips were thermal sealed in a glass capillary. Then the sealed tip was polished on a silicon carbide polishing sandpaper until a Pt nanodisk was exposed, which was monitored by using an electronic feedback circuit. The radius ( $a$ ) of obtained nanoelectrode was calculated through testing the steady-state diffusion-limited current ( $i_d$ ) associated with the reduction of proton in 0.1 M HClO<sub>4</sub> solution.  $i_d = 4nFDC^*a$ , where  $n$  is the number of electrons transferred per molecule,  $F$  is Faraday constant,  $D$  is the diffusion coefficient of proton ( $7.8 \times 10^{-5}$  cm<sup>2</sup>/s),<sup>2</sup> and  $C^*$  is the bulk concentration of proton.

**Electrochemical measurements.** The electrochemical measurements were performed on a CHI 760E electrochemical workstation. For the measurements of Pt nanoelectrode, an Ag/AgCl was used as the counter/reference electrodes. The radius test was carried out via voltammetry in 0.1 M HClO<sub>4</sub> solution at a sweep rate of 100 mV/s with 0.1 M NaClO<sub>4</sub> added as supporting electrolyte. The nanobubble tests were performed by the voltammograms in 0.5 M HClO<sub>4</sub> solution at a sweep rate of 100 mV/s. For HER measurements, a typical three-electrode system was used. A Pt rotating disk electrode (Pine Instruments, diameter of 5 mm) was used as the working electrode with a graphite rod as the counter electrode and an Ag/AgCl as the reference electrode. All the potentials were calibrated with respect to the reversible hydrogen electrode (RHE),<sup>3</sup> and in 0.5 M HClO<sub>4</sub> solution with all the PFOS concentrations,  $E_{\text{RHE}} = E_{\text{Ag/AgCl}} + 0.205$  V. The cyclic voltammetry (CV) measurements were recorded in 0.5 M HClO<sub>4</sub> solution at a sweep rate of 50 mV/s under a flow of N<sub>2</sub>. The polarization curves were obtained in N<sub>2</sub>-saturated 0.5 M HClO<sub>4</sub> electrolyte at a rotation rate of 1,600 rpm and a scan rate of 2 mV/s. The galvanostatic measurements were carried out in an N<sub>2</sub>-saturated 0.5 M HClO<sub>4</sub> solution under a current density of 10 mA cm<sup>-2</sup>.

**Characterizations.** SEM images were taken using a JSM-7600 field-emission scanning electron microscope operated at 15 kV. Digital images were collected on an optical microscope with a high-speed charge coupled device (OMAX). Electrical continuity during nanoelectrode polishing was measured using a high-input impedance (MOSFET)-based circuit.

## References

- 1 B. Zhang, J. Galusha, P. G. Shiozawa, G. L. Wang, A. J. Bergren, R. M. Jones, R. J. White, E. N. Ervin, C. C. Cauley, H. S. White, *Anal. Chem.* 2007, **79**, 4778.
- 2 Q. J. Chen, L. Luo, *Langmuir*, 2018, **34**, 4554.
- 3 Y. Y. Liang, Y. G. Li, H. L. Wang, J. G. Zhou, J. Wang, T. Regier, H. J. Dai, *Nat. Mater.* 2011, **10**, 780.

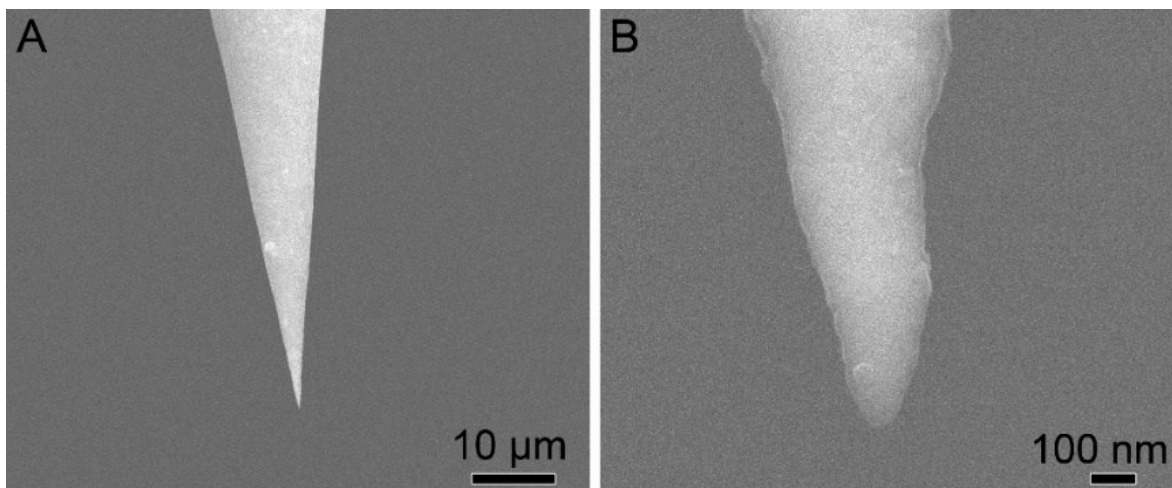

**Figure S1.** (A) SEM image of a Pt tip fabricated by electrochemical etching. (B) Corresponding SEM image of Pt tip with high magnification.

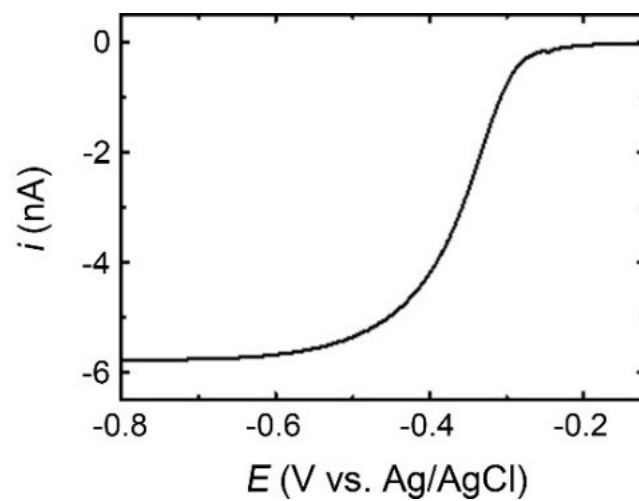

**Figure S2.** Steady-state voltammetric response of Pt nanoelectrode recorded at a sweep rate of 100 mV/s.

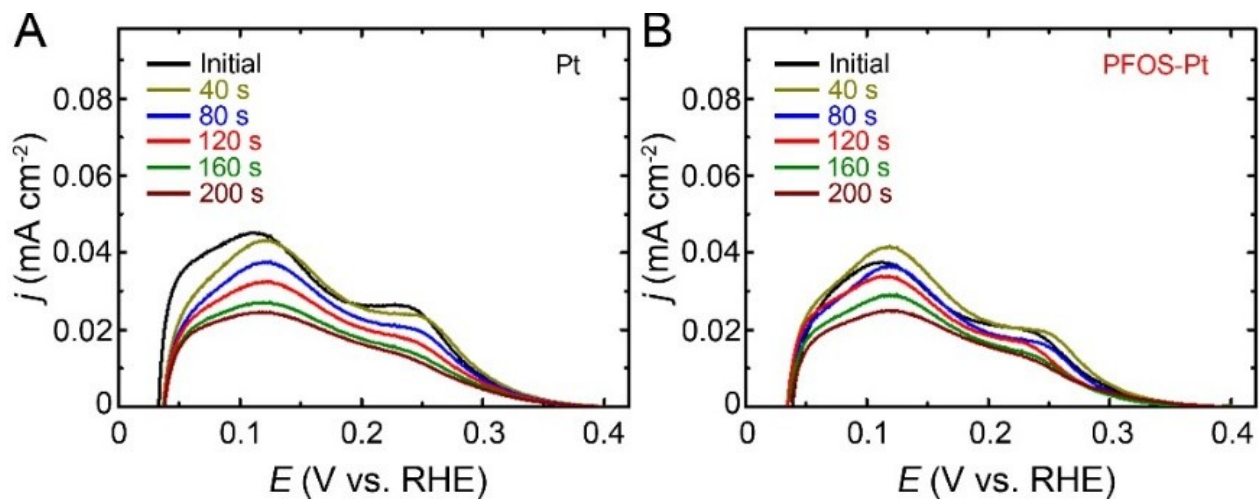

**Figure S3.** The blow-ups of  $H_{\text{upd}}$  desorption peaks for (A) pure Pt and (B) PFOS-Pt at different galvanostatic test time.

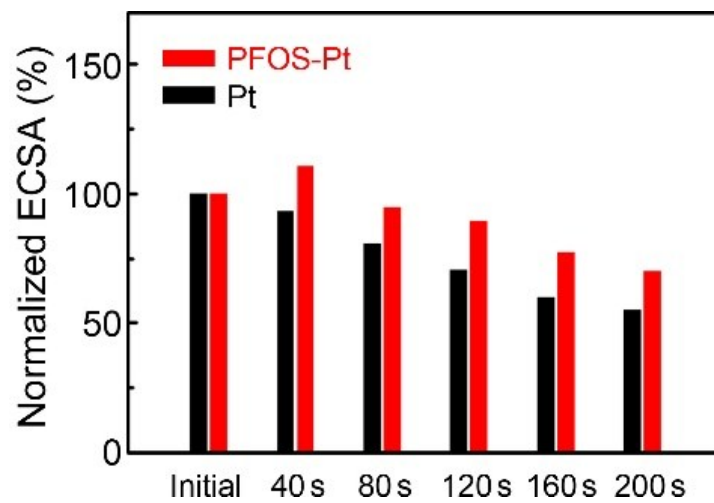

**Figure S4.** Normalized ECSA for PFOS-Pt and pure Pt before and after long-term galvanostatic test.

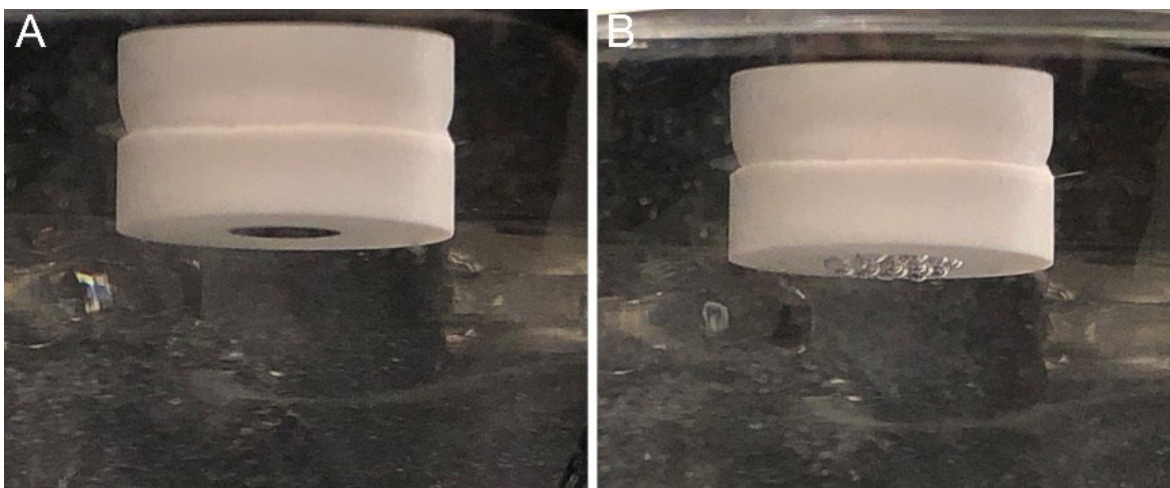

**Figure S5.** Bubble generation on the electrode (A) before and (B) after HER test without applying a rotating speed.

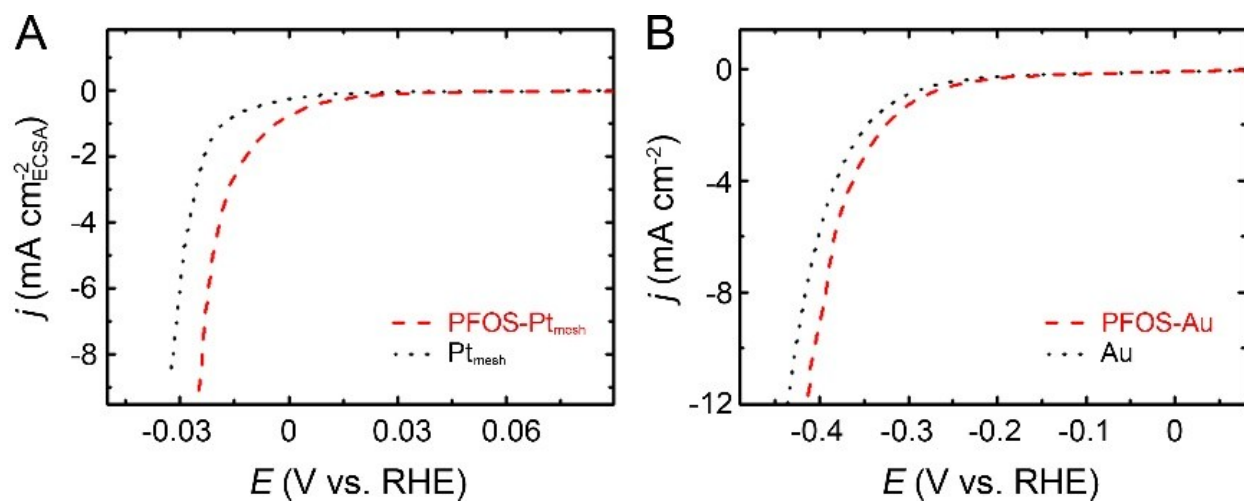

**Figure S6.** *iR*-corrected polarization curves of (A) Pt mesh and (B) Au disk electrode with PFOS modulation.



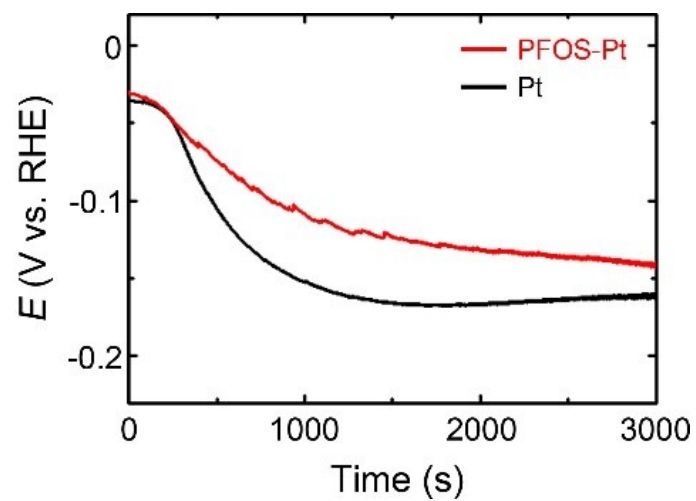

**Figure S7.** Chronopotentiometric measurements for PFOS-Pt and pure Pt at the cathodic current density of  $10 \text{ mA cm}^{-2}$ .

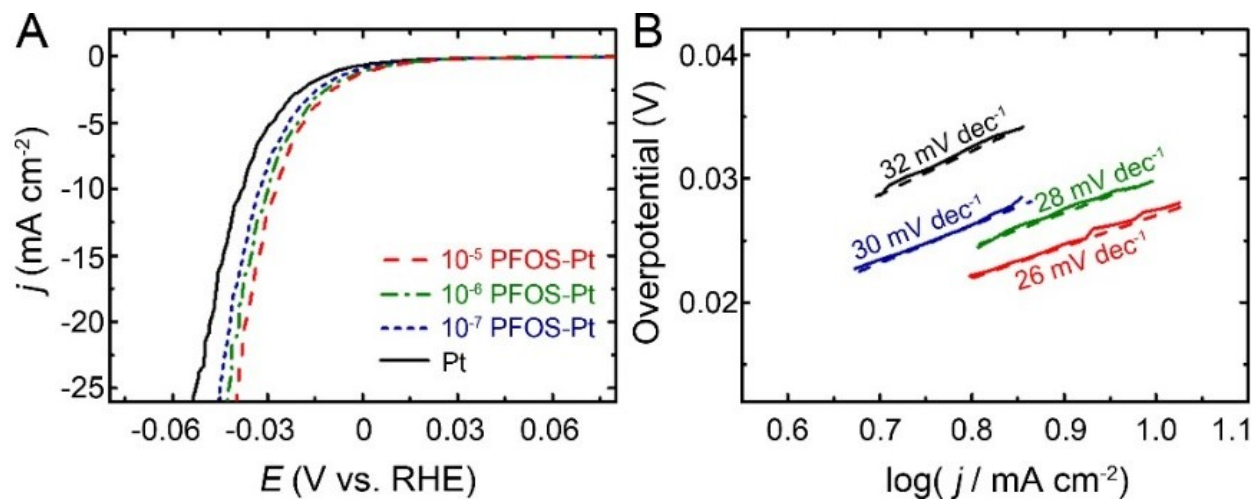

**Figure S8.** (A) *iR*-corrected polarization curves of PFOS-Pt with different PFOS concentrations in N<sub>2</sub>-saturated 0.5 M HClO<sub>4</sub> solution. (B) Tafel plots of PFOS-Pt with different PFOS concentrations.

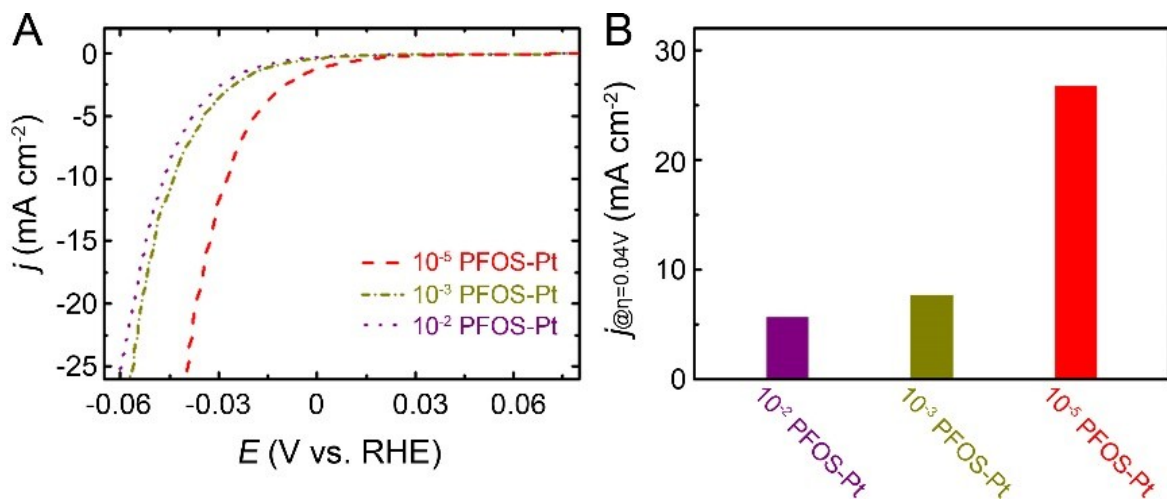

**Figure S9.** (A)  $iR$ -corrected polarization curves of PFOS-Pt with high PFOS concentrations. (B) Comparison of current densities of PFOS-Pt with high PFOS concentrations.

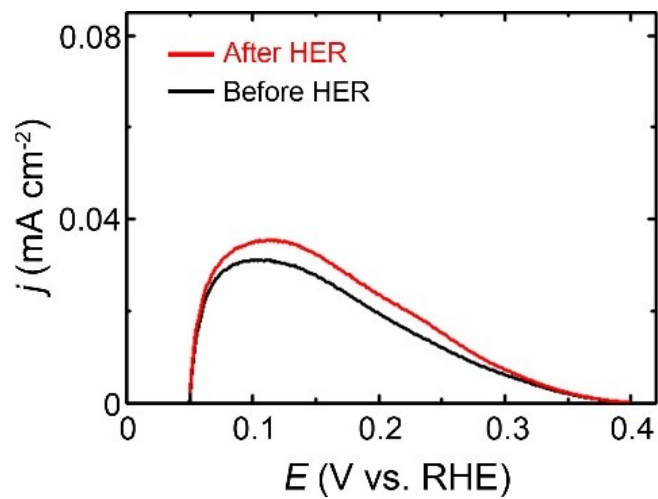

**Figure S10.** Comparison of the blow-ups of  $\text{H}_{\text{upd}}$  desorption peaks for  $10^{-5}$  PFOS-Pt before and after HER test.
